# Supplementary material for: Electric-field assisted perovskite crystallization for high-performance solar cells
Source: Royal Society of Chemistry journal article supplement (doi:10.1039/c7ta08204e), 2017-12-08
Supplement: c7ta08204e1.pdf [file c7ta08204e1.pdf]

## Supporting Information

### **Electric-Field Assisted Perovskite Crystallization for High-Performance Solar Cells**

Cong-Cong Zhang<sup>a</sup>, Zhao-Kui Wang<sup>\*b</sup>, Meng Li<sup>b</sup>, Zhi-Yong Liu<sup>a</sup>, Ji-En Yang<sup>a</sup>, Ying-Guo Yang<sup>c</sup>, Xing-Yu Gao<sup>c</sup>, and Heng Ma<sup>\*a</sup>

<sup>a</sup> Henan Province Key Laboratory of Photovoltaic Materials & College of Physics & Materials Science, Henan Normal University, Xinxiang 453007, China.

**E-mail:** [hengma@henannu.edu.cn](mailto:hengma@henannu.edu.cn) (H. Ma);

<sup>b</sup> Jiangsu Key Laboratory for Carbon-Based Functional Materials & Devices, Institute of Functional Nano & Soft Materials (FUNSOM), Collaborative Innovation Center of Suzhou Nano Science and Technology, Soochow University, Suzhou, Jiangsu 215123, China.

**E-mail:** [zkwang@suda.edu.cn](mailto:zkwang@suda.edu.cn) (Z.K. Wang)

<sup>c</sup> Shanghai Synchrotron Radiation Facility, Shanghai Institute of Applied Physics, Chinese Academy of Sciences, Shanghai 201204, China.

Corresponding Authors:

[hengma@henannu.edu.cn](mailto:hengma@henannu.edu.cn) (H. Ma); [zkwang@suda.edu.cn](mailto:zkwang@suda.edu.cn) (Z.K. Wang)

**Keywords:** Perovskite solar cells; Electric-field assisted annealing; Ion migration; Ferroelectricity

## Table of Contents

**Figure S1.** The construction of EEF system during the annealing treatment.

**Figure S2.** The perovskite films photograph taken during annealing process.

**Figure S3.** The schematic of the GIXRD and the integrated intensity plots around (110) plane along different direction.

**Figure S4.**  $J$ - $V$  curves of PSCs with and without EEF treatment with a regular structure device.

**Table S1.** Detailed photostatic parameters of PSCs in Fig. S3.

**Figure S5.** The statistical average values and standard deviations of parameters.

**Figure S6.** The statistical histograms of PCE based on different treatments.

**Table S2.** The parameters of  $J$ - $V$  hysteresis on PSCs with different annealing process.

**Figure S7.** The statistical IPCE histogram of PSCs with and without EEF treatment.

**Figure S8.** IPCE of PSCs with EEF-assist and thermal-annealing-only process.

**Figure S9.** Surface CPD patterns obtained by KPFM of different PSCs.

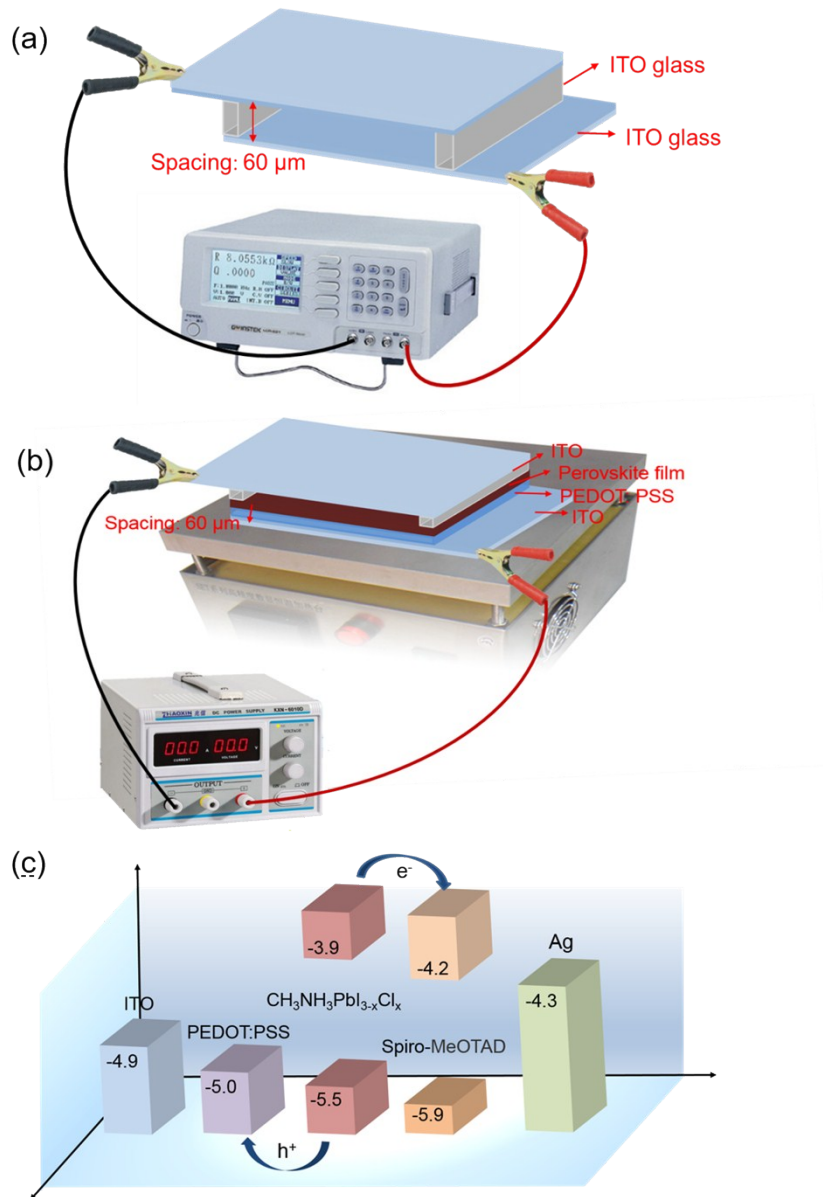

**Figure S1.** (a) The construction of measuring the spacing. (b) The construction of EEF system during the annealing treatment. (c) The energy diagram in perovskite solar cells.

### Measurement the spacing

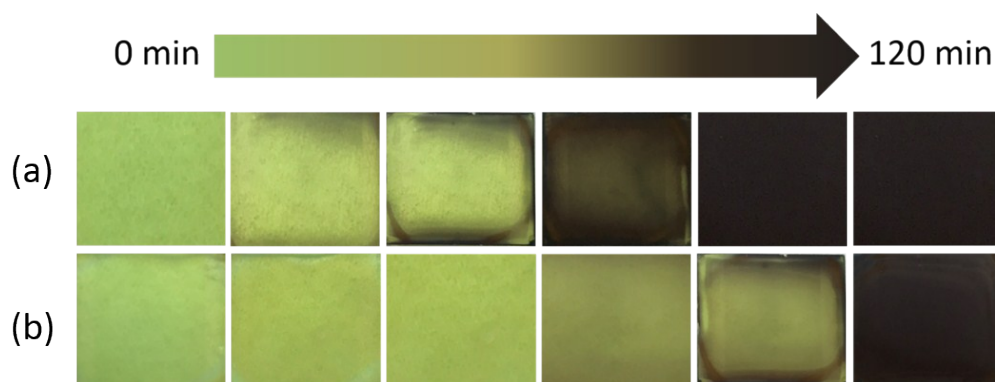

**Figure S2.** The perovskite films photograph taken during annealing process per 20 min. (a) is the reference perovskite film, and (b) is the 2.5 V/ $\mu\text{m}$  (up or down)-EEF based perovskite film.

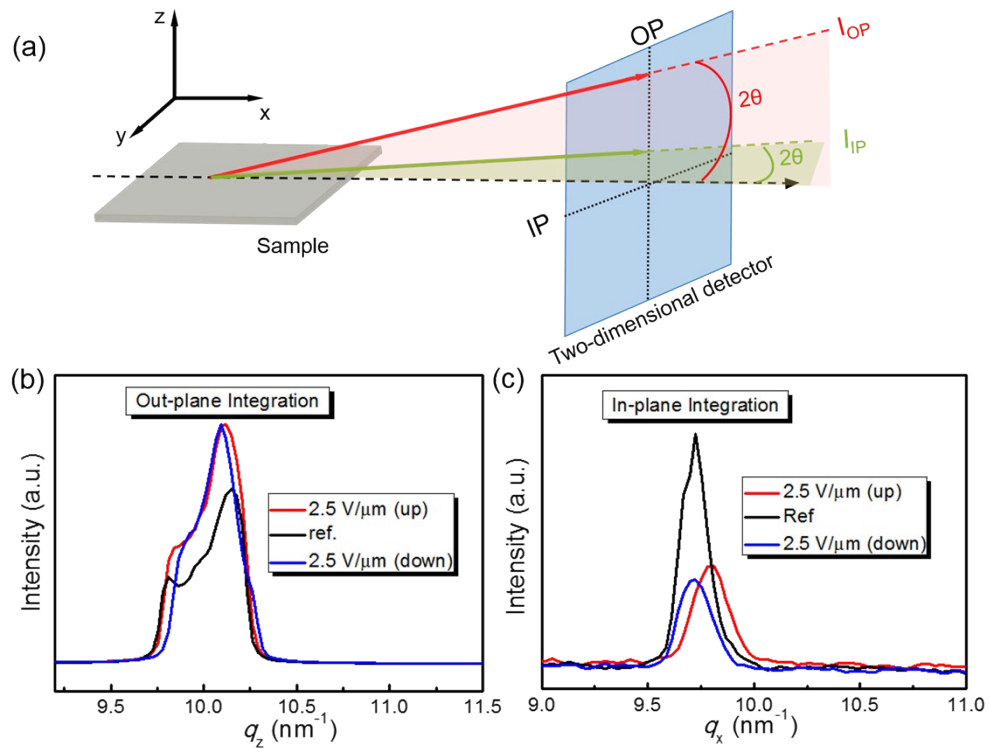

**Figure S3.** (a) The schematic of the GIXRD experimental setup for detecting the crystalline information of the perovskite films, where IOP, and IIP are the scattering beam in the direction of out-plane and in-plane, respectively. The integrated intensity plots around (110) plane along the (a) out-plane direction and (b) in-plane direction.

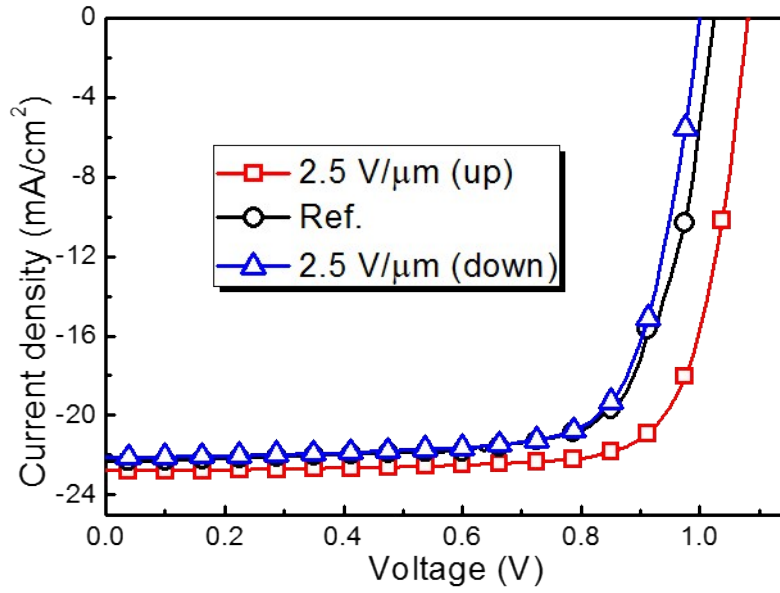

**Figure S4.**  $J$ - $V$  curves of PSCs with and without EEF treatment with a regular structure of ITO/TiO<sub>2</sub>/CH<sub>3</sub>NH<sub>3</sub>PbI<sub>3</sub>/Spiro-MeOTAD/Ag.

**Table S1.** Detailed photovoltaic parameters of PSCs in Fig. S3.

|                 | $V_{oc}$ (V) | $J_{sc}$ (mA/cm <sup>2</sup> ) | FF   | PCE (%) |
|-----------------|--------------|--------------------------------|------|---------|
| 2.5 V/μm (up)   | 1.09         | 22.80                          | 0.77 | 19.18   |
| Ref.            | 1.03         | 22.33                          | 0.73 | 16.77   |
| 2.5 V/μm (down) | 1.01         | 22.13                          | 0.74 | 16.57   |

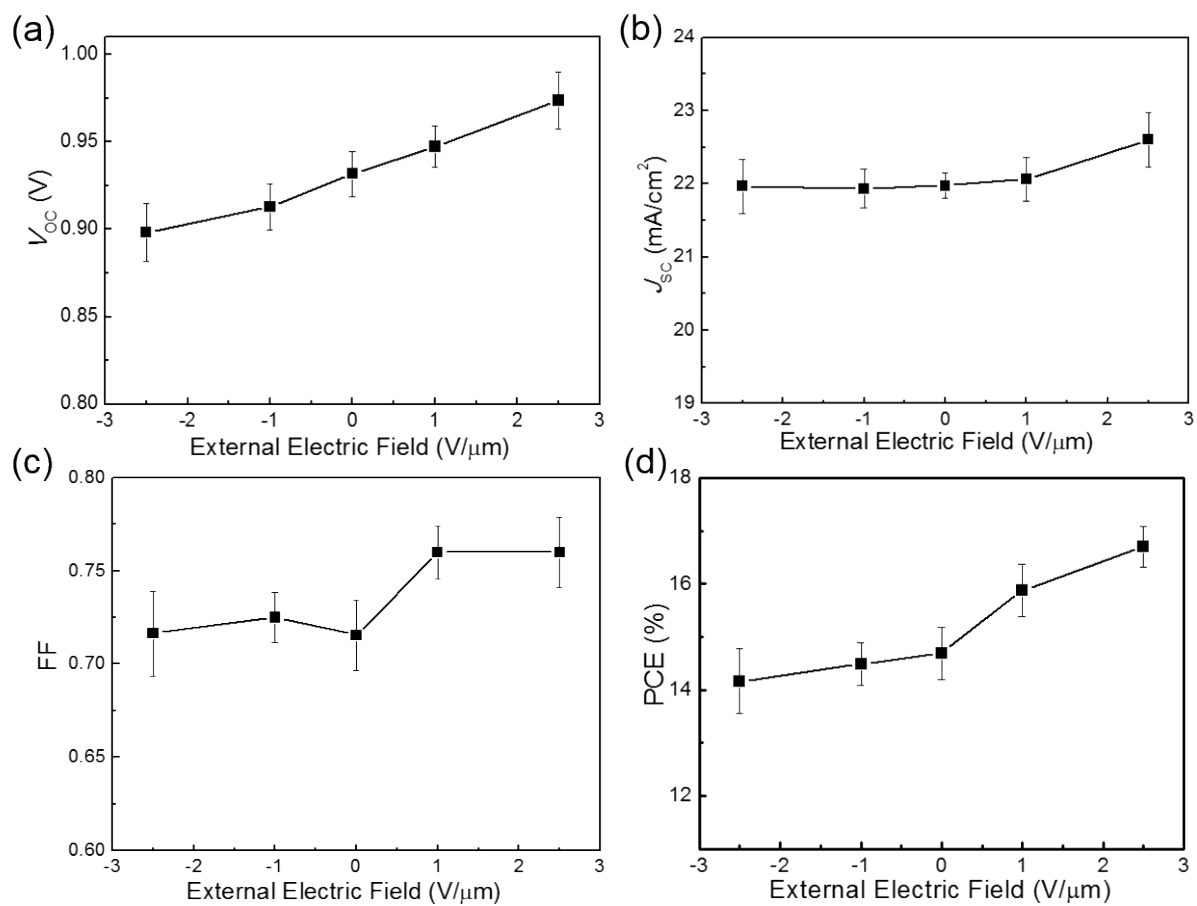

**Figure S5.** The statistical curves of average values and standard deviations of (a)  $V_{OC}$ , (b)  $J_{SC}$ , (c) FF and (d) PCE.

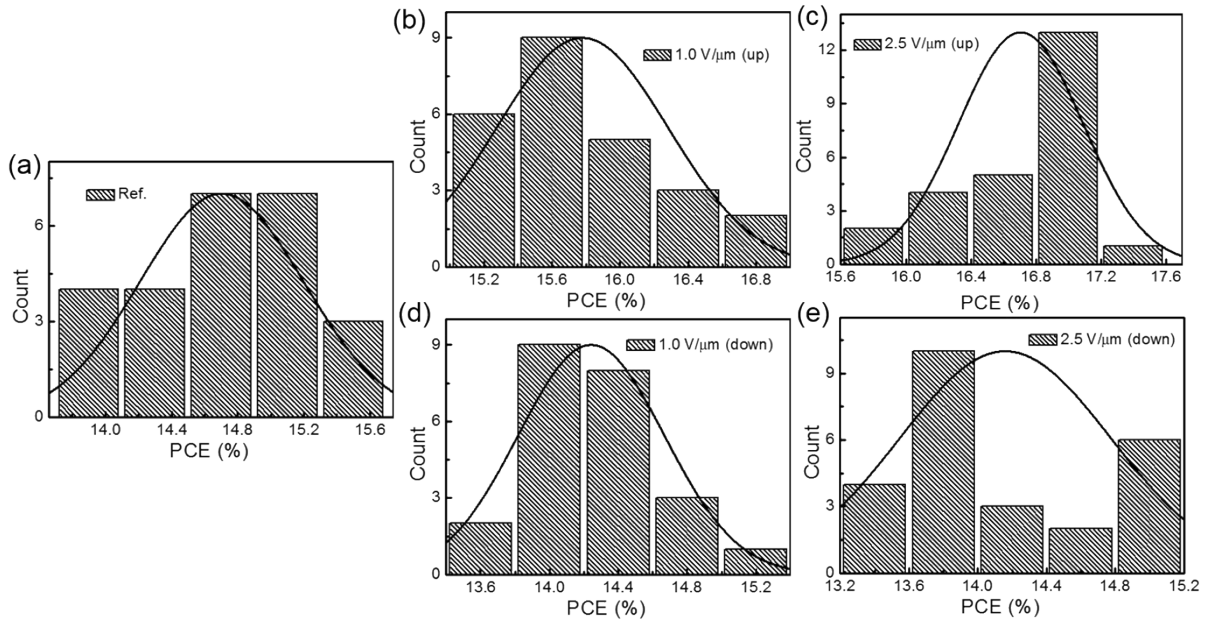

**Figure S6.** The statistical histograms of PCE based on (a) the reference devices, (b) 1.0 V/μm (up), (c) 2.5 V/μm (up), (d) 1.0 V/μm (down), and (e) 2.5 V/μm (down).



**Table S2.** Parameters of  $J$ - $V$  hysteresis on PSCs with different annealing process by fitting linear part in Fig. 4 (d).

| <b>Device</b>         | <b>Scan direction</b> | <b><math>V_{OC}</math> (V)</b> | <b><math>J_{SC}</math> (mA/cm<sup>2</sup>)</b> | <b>FF (%)</b> | <b>PCE (%)</b> |
|-----------------------|-----------------------|--------------------------------|------------------------------------------------|---------------|----------------|
| 2.5 V/ $\mu$ m (up)   | Forward               | 0.98                           | 22.64                                          | 0.78          | 17.26          |
|                       | Reverse               | 0.98                           | 22.60                                          | 0.77          | 17.02          |
|                       | Average               | 0.98                           | 22.62                                          | 0.78          | 17.14          |
| Ref.                  | Forward               | 0.93                           | 21.80                                          | 0.75          | 15.33          |
|                       | Reverse               | 0.93                           | 21.62                                          | 0.73          | 14.68          |
|                       | Average               | 0.93                           | 21.71                                          | 0.74          | 15.01          |
| 2.5 V/ $\mu$ m (down) | Forward               | 0.92                           | 21.90                                          | 0.75          | 15.18          |
|                       | Reverse               | 0.94                           | 21.98                                          | 0.75          | 15.49          |
|                       | Average               | 0.93                           | 21.94                                          | 0.75          | 15.34          |

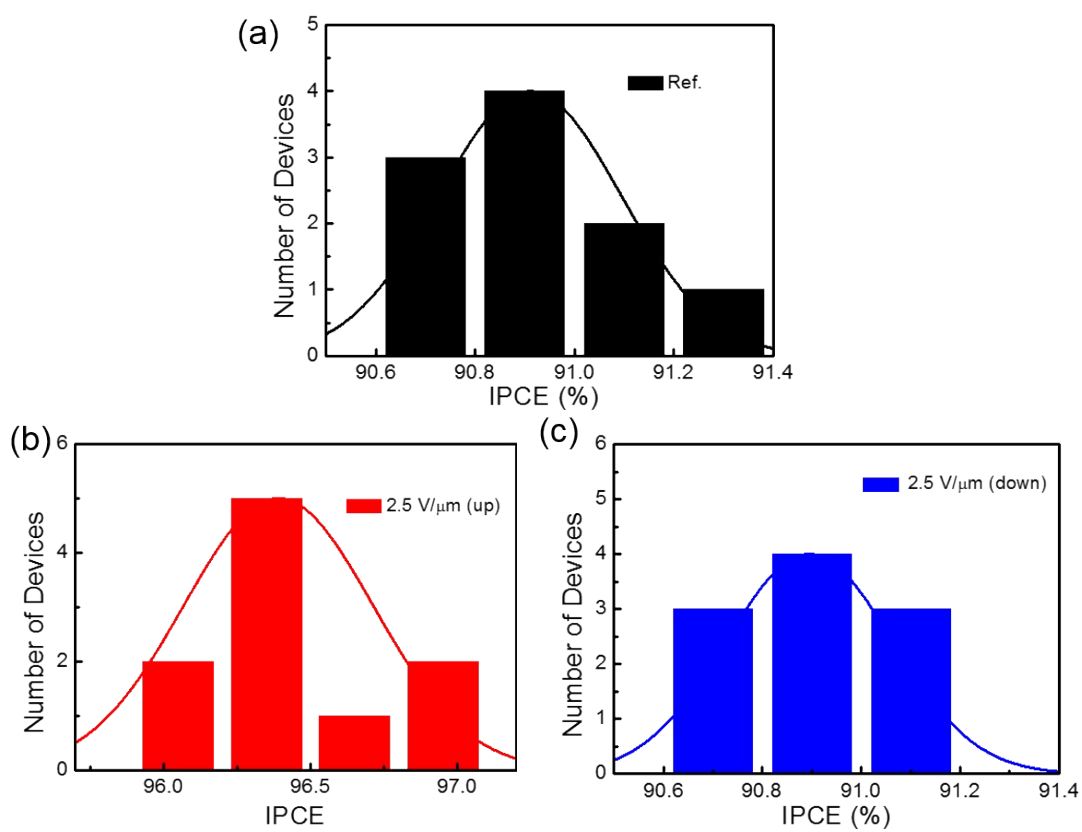

**Figure S7.** The statistical IPCE histogram of PSCs with and without EEF treatment.

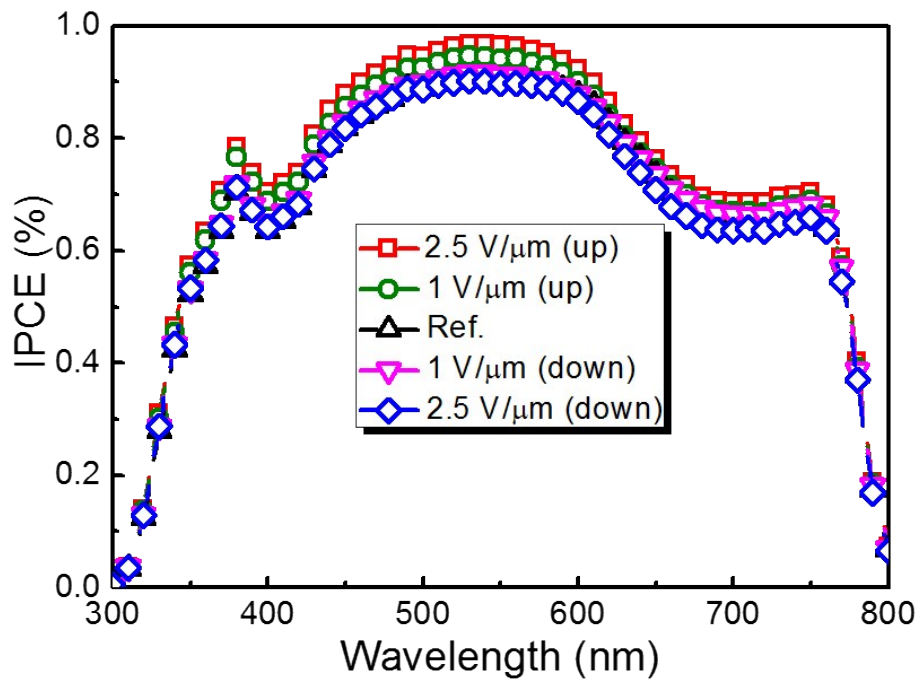

**Figure S8.** IPCE of PSCs with EEF-assist and thermal-annealing-only process.

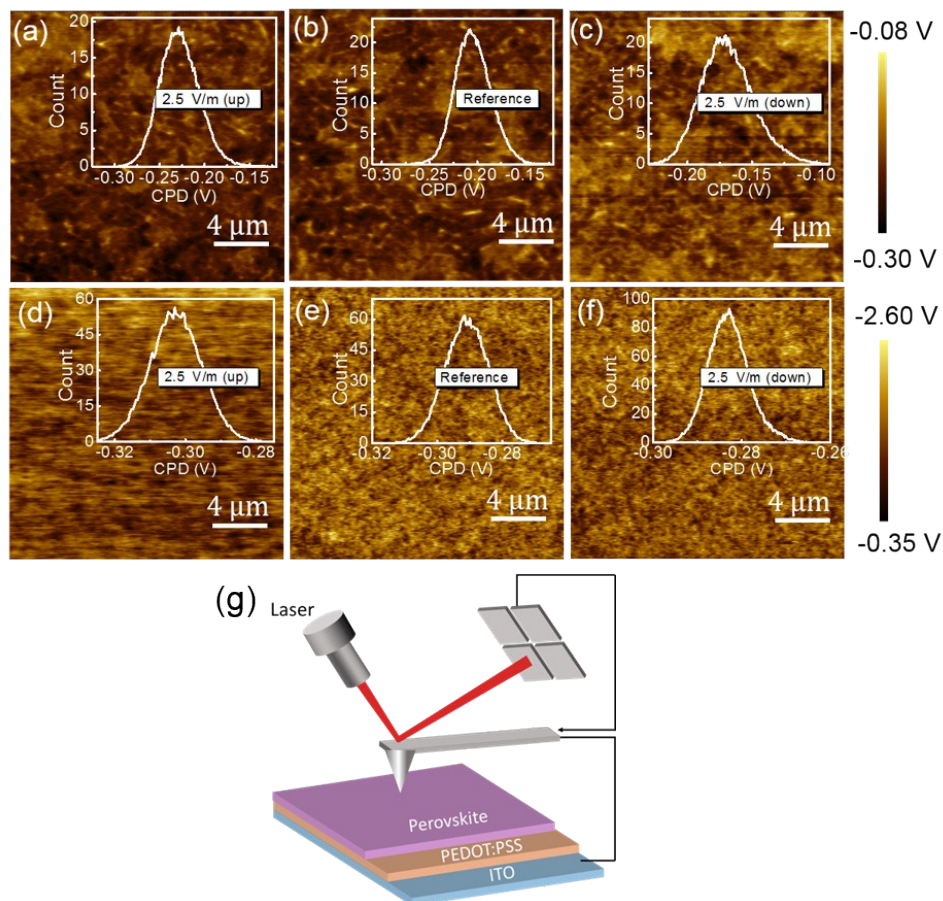

**Figure S9.** Surface CPD patterns obtained by KPFM based on (a-c)  $\text{CH}_3\text{NH}_3\text{PbI}_{3-x}\text{Cl}_x$  and (d-f)  $\text{CH}_3\text{NH}_3\text{PbI}_3$  films. (a, d) are after up-EEF treatment of  $2.5 \text{ V}/\mu\text{m}$ . (b, d) are the reference films. (c, d) are after down-EEF treatment of  $2.5 \text{ V}/\mu\text{m}$ . The inserts represent the statistic distributions CPD of different films. (g) The schematic diagram of KPFM to measure the surface CPD of the perovskite films.
